# Supplementary material for: Modelling the cost-effectiveness of introducing the RTS,S malaria vaccine relative to scaling up other malaria interventions in sub-Saharan Africa
Source: PubMed Central journal article supplement (PMC5321383; doi:10.1136/bmjgh-2016-000090), 2017-01-24
Supplement: bmjgh-2016-000090supp.pdf [file bmjgh-2016-000090supp.pdf]

# 1 Supplementary materials

## 2 Transmission model

### 3 Human Dynamics

4 We outline the model here in a deterministic formulation. For all simulations presented the  
5 equivalent individual-based stochastic model was used.[1] The stochastic version only differs  
6 structurally from the deterministic version in the non-exponential durations of prophylactic  
7 protection after treatment.

8 Let  $\Lambda$  be the force of infection, which is dependent upon the entomological inoculation rate (EIR)  
9 and determines the rate at which susceptible individuals ( $s$ ) become infected. Infected individuals  
10 undergo a latent period (12 days) after which they may develop symptoms with a given probability,  
11  $\phi$ , or develop an asymptomatic infection (with probability  $1 - \phi$ ) and move to compartment  $A$ .  
12 Individuals who develop symptoms may either be successfully treated (with probability  $f_T$ , moving  
13 to state  $T$  or remain untreated or fail treatment (with probability  $1 - f_T$ ), moving to state  $D$ . An  
14 individual who has been successfully treated moves to state  $P$ , representing a period of  
15 prophylactic protection from re-infection, before returning to the susceptible state. Those failing  
16 treatment are assumed to become patently asymptomatic, moving to state  $A$ . Patent asymptomatic  
17 infections progress to sub-patent asymptomatic infections (state  $U$ ) which are cleared at a given  
18 rate, returning an individual to the susceptible state. Super-infection may occur from states  $A$  and  
19  $U$ .

20 These dynamics are captured by the following differential equations:

$$\begin{aligned}
\frac{\partial S}{\partial t} + \frac{\partial S}{\partial a} + \frac{\partial S}{\partial \zeta} &= -\Lambda S + P/d_p + U/d_U \\
\frac{\partial T}{\partial t} + \frac{\partial T}{\partial a} + \frac{\partial T}{\partial \zeta} &= \phi f_T \Lambda (S + A + U) - T/d_T \\
\frac{\partial D}{\partial t} + \frac{\partial D}{\partial a} + \frac{\partial D}{\partial \zeta} &= \phi (1 - f_T) \Lambda (S + A + U) - D/d_D \\
\frac{\partial A}{\partial t} + \frac{\partial A}{\partial a} + \frac{\partial A}{\partial \zeta} &= (1 - \phi) \Lambda (S + U) + D/d_D - \phi \Lambda A - A/d_A \\
\frac{\partial U}{\partial t} + \frac{\partial U}{\partial a} + \frac{\partial U}{\partial \zeta} &= A/d_A - U/d_U - \Lambda U \\
\frac{\partial P}{\partial t} + \frac{\partial P}{\partial a} + \frac{\partial P}{\partial \zeta} &= T/d_T - P/d_p
\end{aligned} \tag{1.1}$$

21 where  $t$  is time,  $a$  age and  $\zeta$  the rate at which an individual is bitten,  $d_T, d_D, d_A, d_U, d_p$  are the  
22 mean duration spent in states  $T, D, A, U$ , and  $P$  respectively.

23 Heterogeneity to exposure captures age-dependent exposure as well as heterogeneities in  
24 exposure due to other factors such as locational differences. Each individual is assigned a relative  
25 biting rate,  $\zeta$ , parametrised with scale  $= -\sigma^2 / 2$  and shape  $= \sigma$  ensuring  $\zeta$  has a mean of 1. The  
26 EIR and force of infection at age  $a$  are therefore:

$$\begin{aligned}
\varepsilon &= \varepsilon_0 \zeta (1 - \rho \exp(-a/a_0)) \\
\Lambda &= \varepsilon b
\end{aligned} \tag{1.2}$$

27 where  $\varepsilon_0$  is the mean EIR for adults,  $b$  is the probability of infection upon being bitten by an  
28 infectious mosquito and  $\rho$  and  $a_0$  parameterise the change in the rate of being bitten as a function  
29 of age.

30 The effects of immunity are included in the transmission model at a number of stages. These are:

- 31 i) Maternal immunity – A degree of protection against infection after being born is  
32 conferred from mother to child. This protection decreases the probability of infection  
33 upon being bitten by an infectious mosquito ( $b$ ). The level of protection is a function of  
34 the mother's immunity and wanes at a given rate.

37        ii)        Blood stage immunity – Reduces the probability of developing clinical disease upon  
38                    infection ( $\phi$ ). Reduces blood stage parasite densities, leading to decreased detectability  
39                    and decreased onwards infection of mosquitoes.

40        iii)        Pre-erythrocytic immunity – Reduces the probability of infection upon being bitten by an  
41                    infectious mosquito ( $b$ ) in older children and adults.

42        Full details of the functional implementation of immunity in the transmission model are found in  
43        Griffin *et al* (2014).[2] Human parameters are shown in Table 1.

44 **Table 1. Human transmission model parameters, definition and values.**

| Parameter                               | Description                                                                   | Estimate (95% credible interval)          |
|-----------------------------------------|-------------------------------------------------------------------------------|-------------------------------------------|
| <b>Human infection duration</b>         |                                                                               |                                           |
| $d_E$                                   | Latent period                                                                 | 12 days (fixed)                           |
| $d_I$                                   | Patent infection                                                              | 200 days (fixed)                          |
| $d_T$                                   | Clinical disease (treated)                                                    | 5 days (fixed)                            |
| $d_D$                                   | Clinical disease (untreated)                                                  | 5 days (fixed)                            |
| $d_U$                                   | Sub-patent infection                                                          | 110 days (87,131)                         |
| $d_P$                                   | Prophylaxis following treatment                                               | Drug-dependent                            |
| <b>Infectiousness to mosquitoes</b>     |                                                                               |                                           |
| $t_i$                                   | Lag from parasites to infectious gametocytes                                  | 12.5 days (fixed)                         |
| $c_D$                                   | Untreated disease                                                             | 0.068 day <sup>-1</sup> (0.039, 0.122)    |
| $c_T$                                   | Treated disease                                                               | Drug-dependent                            |
| $c_U$                                   | Sub-patent infection                                                          | 0.0062 day <sup>-1</sup> (0.00056, 0.018) |
| $\theta$                                | Relates probability of detection to infectiousness for asymptomatic infection | 1.82 (0.603, 8.54)                        |
| <b>Age and heterogeneity</b>            |                                                                               |                                           |
| $\rho$                                  | Age-dependent biting parameter                                                | 0.85 (fixed)                              |
| $a_0$                                   | Age-dependent biting parameter                                                | 8 years (fixed)                           |
| $\sigma^2$                              | Variance of the log heterogeneity in biting rates                             | 1.67 (fixed)                              |
| <b>Parameters depending on immunity</b> |                                                                               |                                           |
| $\phi$                                  | Probability that an infection leads to disease                                | See [2] for further details               |
| $b$                                     | Probability of infection                                                      |                                           |
| <b>Treatment</b>                        |                                                                               |                                           |
| $f_T$                                   | Probability of effective treatment                                            | Varied                                    |

45

## 46 Mosquito Dynamics

47 The mosquito dynamics model has been previously described.[1,3] The deterministic,

48 compartmental formulation of the model is as follows:

49

$$\begin{aligned}
\frac{dL_1}{dt} &= \beta M - \mu_{L_1} \left( 1 + \frac{L_1 + L_3}{K} \right) L_1 - \frac{L_1}{d_1} \\
\frac{dL_3}{dt} &= \frac{L_1}{d_1} - \mu_{L_3} \left( 1 + \gamma \frac{L_1 + L_3}{K} \right) L_3 - \frac{L_3}{d_3} \\
\frac{dPu}{dt} &= \frac{L_3}{d_3} - \mu_p Pu - \frac{Pu}{d_p} \\
\frac{dS_M}{dt} &= \frac{Pu}{2d_p} - \mu S_M
\end{aligned}
\tag{1.3}$$

50 where  $L_1$  and  $L_3$  represent early (I1 and I2 instars) and late (I3 and I4 instars) larval developmental  
51 stages respectively,  $Pu$  the pupal stage and  $S_M$  susceptible adult female mosquitoes of  $M$  total  
52 female mosquitoes (representing 50% of the total population). The death rates of early- and late-  
53 stage larvae, pupae and adult female mosquitoes are represented by the terms  $\mu_{L_1}$ ,  $\mu_{L_3}$ ,  $\mu_p$  and,  $\mu$   
54 respectively. Females are assumed to lay eggs at a rate of  $\beta$  per day. We assume that larval  
55 mortality is density dependent, influenced by the carrying capacity of the environment to larvae, at  
56 time  $t$ , characterised by the following functional form:

57

$$K(t) = K^* \frac{R(t)}{E[R(t)]} \tag{1.4}$$

58 where  $R(t)$  is the rainfall at time  $t$ . The additional contribution of the later larval development stages  
59 to density-dependent constraints is quantified by the parameter  $\gamma$ .

60 Susceptible female mosquitoes become infected at a rate governed by the human-to-vector force of  
61 infection at time  $t$ ,  $\Lambda_M(t)$ , a function of infectious compartments in the human population ( $D$ ,  $T$ ,  
62  $A$ , and  $U$ ) and the relative infectivity of each state ( $c_D$ ,  $c_T$ ,  $c_A$ , and  $c_U$ ), integrated over all human  
63 age groups and heterogeneity of exposures:

64

$$\Lambda_M(t) = \frac{Q_0}{\omega \delta} \int \int_{\zeta a} \zeta \psi(a) (c_D D(\zeta, a, t - t_i) + c_T T(\zeta, a, t - t_i) + c_A A(\zeta, a, t - t_i) + c_U U(\zeta, a, t - t_i)) da d\zeta. \tag{1.5}$$

65 where  $\omega$  is a normalising constant for the biting rate over all ages,  $Q_0$  denotes the level of  
 66 anthropophagy and  $\delta$  the mean time between feeds. Human-to-vector infectivity is lagged  $t_i$  behind  
 67 human infection, to account for the period of time between a human becoming infected and the  
 68 appearance of gametocytes (the infectious stage to mosquitoes) in the bloodstream.

69 The progression of infection within mosquitoes can then be described with the following set of  
 70 differential equations:

$$\begin{aligned}
 \frac{dS_M}{dt} &= \frac{Pu}{2d_p} - \Lambda_M S_M - \mu S_M \\
 \frac{dE_M}{dt} &= \Lambda_M S_M - \Lambda_M(t - \tau_M) S_M(t - \tau_M) P_M - \mu E_M \\
 \frac{dI_M}{dt} &= \Lambda_M(t - \tau_M) S_M(t - \tau_M) P_M - \mu I_M.
 \end{aligned}
 \tag{1.6}$$

72 where the states  $E_M$  and  $I_M$  represent females in latent (not infectious to humans) and infectious  
 73 stages respectively. The rate of transition to the infectious state is governed by the duration of  
 74 sporogony,  $\tau_M$ , capturing the lag between a mosquito becoming infected and sporozoites being  
 75 present in the salivary glands. The probability that an adult female survives to become infectious,  
 76 having been infected,  $P_M$ , is therefore:

$$P_M = \exp(-\mu\tau_M)
 \tag{1.7}$$

78 And the EIR is defined as:

$$EIR_0 = \frac{I_M \alpha}{\omega}
 \tag{1.8}$$

80 Mosquito parameters are shown in Table 2.

81 **Table 2. Mosquito transmission model parameters, description and values.**

| Parameter   | Description                                                                     | Value                                 |
|-------------|---------------------------------------------------------------------------------|---------------------------------------|
| $\mu$       | Daily mortality of adults (based on <i>An.gambiae</i> complex)                  | 0.132 day <sup>-1</sup> (fixed)       |
| $\mu_E^0$   | Per capita daily mortality rate of early instars (low density)                  | 0.034 (0.024-0.044) day <sup>-1</sup> |
| $\mu_L^0$   | Per capita daily mortality rate of late instars (low density)                   | 0.035 (0.025-0.044) day <sup>-1</sup> |
| $\mu_p$     | Per capita daily mortality rate of pupae                                        | 0.25 (0.18-0.32) day <sup>-1</sup>    |
| $\delta$    | Duration of gonotrophic cycle                                                   | 3 days                                |
| $d_E$       | Development time of early larval instars                                        | 6.64 (4.82-8.53) days                 |
| $d_L$       | Development time of late larval instars                                         | 3.72 (2.03-5.61) days                 |
| $d_p$       | Development time of pupae                                                       | 0.64 (0.07-1.47) days                 |
| $\beta$     | Number of eggs laid per day per mosquito                                        | 21.19 (11.57-25.31) day <sup>-1</sup> |
| $\gamma$    | Relative effect of density dependence on late instars relative to early instars | 13.25 (9.82-17.51)                    |
| $K$         | Environmental carrying capacity                                                 | See expression above                  |
| $\tau_M$    | Extrinsic incubation period                                                     | 10 days                               |
| $\Lambda_M$ | Force of infection on adult mosquitoes                                          | See expression above.                 |
| $Q_0$       | Degree of anthrophagy of the vector                                             | See Table 3                           |

82

## 83 Vector profiles

84 We represent the range of different vector species compositions observed across sub-Saharan Africa  
85 using four vector profiles. The profiles are characterised by four parameters the proportion of  
86 human-biting ( $Q_0$ ), indoor biting ( $\Phi_I$ ), indoor resting ( $\chi$ ), and biting on humans in bed ( $\Phi_B$ ). The  
87 probabilities for each profile are defined in Table 3.

88 **Table 3. Vector profile parameters, definitions and values (Walker et al in press).**

| Parameter | Description         | <i>A.gambiae s.s./<br/>A.funestus</i><br>only | <i>A.gambiae/A.funestus</i><br>dominant | Intermediate | <i>A.arabiensis</i><br>dominant |
|-----------|---------------------|-----------------------------------------------|-----------------------------------------|--------------|---------------------------------|
| $Q_0$     | Human Biting Index  | 0.93                                          | 0.86                                    | 0.78         | 0.71                            |
| $\Phi_I$  | Endophagy           | 0.96                                          | 0.95                                    | 0.93         | 0.92                            |
| $\Phi_B$  | Indoor bites in bed | 0.93                                          | 0.87                                    | 0.85         | 0.83                            |
| $\chi$    | Endophily           | 0.86                                          | 0.79                                    | 0.72         | 0.65                            |

89

## 90 Seasonal profiles

91 Variation in the seasonality across sub-Saharan transmission settings is captured by the use of four  
 92 different seasonal profiles. These profiles characterise seasonality, based on rainfall time series  
 93 data,[4] from four sites (Fatick, Senegal; Upper East, Ghana; Tanga, Tanzania and Équateur in the  
 94 Democratic Republic of Congo). The time series are Fourier-transformed to produce seasonal curves  
 95 used to scale the carrying capacity of the environment to larvae ( $K(t)$ ) throughout the year.[1]

## 96 Interventions

### 97 Vector control

98 Following,[5] a mosquito will attempt to: i) feed on a human with probability ( $Q_0$ ). ii) feed indoors  
 99 with probability ( $\Phi_I$ ) and iii) feed on a human in bed with probability ( $\Phi_B$ ). During this process the  
 100 mosquito may be killed, repelled or successfully feed.

101 Long lasting insecticide treated nets (LLINs) affect this process by killing (with probability  $r_N$ ) or  
 102 repelling (with probability  $d_N$ ) the mosquito before feeding. These probabilities are defined below:

$$\begin{aligned}
 r_N &= (r_{N0} - r_{NM}) \exp(-t\gamma_N) + r_{NM} \\
 d_N &= d_{N0} \exp(-t\gamma_N) \\
 s_N &= 1 - r_N - d_N
 \end{aligned}
 \tag{1.9}$$

103



104 where  $s_N$  is probability of successful feeding (not being repelled or killed),  $r_{NO}$  and  $d_{NO}$  are the  
 105 probabilities that a new LLIN will repel or kill the mosquito respectively. The decay of insecticidal  
 106 efficacy occurs at rate  $\gamma_N$  from the time the new net was delivered ( $t$ ).

107 Indoor residual spraying (IRS) may repel (with probability  $r_s$ ) the mosquito or kill (with probability  
 108  $d_s$ ) the mosquito post-feeding. This leads to dynamics capture be the following equations:

$$\begin{aligned}
 r_s &= r_{s0} [1 - W(t; \alpha_s, \beta_s)] \\
 d_s &= \chi d_{s0} [1 - W(t; \alpha_s, \beta_s)] \\
 s_s &= 1 - d_s
 \end{aligned}
 \tag{1.10}$$

110 where  $s_s$  is probability of successful feeding (not being repelled or killed). The degree of endophily,  
 111  $\chi$ , represents the probability a mosquito will rest indoors post-feed. Insecticide decay is captures by  
 112 the term  $[1 - W(t; \alpha_s, \beta_s)]$  where  $W(t; \alpha_s, \beta_s)$  is the cumulative distribution of the Weibull  
 113 function with scale and shape parameters  $\alpha_s$  and  $\beta_s$  respectively.

114 With the probabilities defined above, excluding natural vector mortality, a matrix of potential  
 115 outcome probabilities can be produced (Table 4).

116 **Table 4. Vector control outcome probability matrix.**

| Definition                        | IRS only                          | LLINs only                | IRS plus LLINs                                                        |
|-----------------------------------|-----------------------------------|---------------------------|-----------------------------------------------------------------------|
| Probability of successful feeding | $1 - \Phi_I + \Phi_I(1 - r_s)s_s$ | $1 - \Phi_B + \Phi_B s_N$ | $1 - \Phi_I + \Phi_B(1 - r_s)s_N s_s + (\Phi_I - \Phi_B)(1 - r_s)s_s$ |
| Probability of biting             | $1 - \Phi_I + \Phi_I(1 - r_s)$    | $1 - \Phi_B + \Phi_B s_N$ | $1 - \Phi_I + \Phi_B(1 - r_s)s_N + (\Phi_I - \Phi_B)(1 - r_s)$        |
| Probability of repelling          | $\Phi_I r_s$                      | $\Phi_B r_N$              | $\Phi_B(1 - r_s)r_N + \Phi_I r_s$                                     |

117

## 118 Seasonal malaria chemoprevention

119 Seasonal malaria chemoprevention (SMC) is implemented as three courses of SP-amodiaquine given  
 120 to children between 6 months and 5 years of age during the transmission season. The timing of the  
 121 interventions is synchronised with the peak of the transmission season, determined by the time-

122 varying carrying capacity ( $K(t)$ ), with treatments given 1 month prior, at the time of and one month  
 123 post this peak. SMC was included as an intervention option in simulations with two of the four  
 124 seasonal profiles used (see previous section). SMC implementation works in a similar way to general  
 125 treatment, clearing infections with a given probability and providing those tested with a drug-  
 126 dependent period of prophylaxis.

127 RTS,S

128 We assumed children would be vaccinated with 4 doses at 6, 7.5, 9 and 27 months. Vaccine efficacy  
 129 and waning parameters were as reported in the wider model comparison exercise based on the  
 130 Phase III trial data.[6]

131 We used a biphasic model of antibody decay to estimate RTS,S-induced anti-CSP antibody titres post  
 132 vaccination.[7] An individual's anti-CSP antibody titre at time  $t$  post vaccination can be calculated as:

$$133 \quad CSP(t) = CSP_{\text{peak}} \left( \rho_{\text{peak}} e^{-r_s t} + (1 - \rho_{\text{peak}}) e^{-r_l t} \right) \quad (1.11)$$

134 where,  $CSP_{\text{peak}}$  is the peak anti-CSP antibody titre,  $\rho_{\text{peak}}$  is the proportion of antibody response that is  
 135 short lived (and therefore  $1 - \rho_{\text{peak}}$  the proportion that is long lived),  $r_s$  and  $r_l$  are the rates of decay  
 136 for the short lived and long lived components respectively. Anti-CSP antibody titres are modelled  
 137 similarly following the fourth dose, we assume  $r_s$ ,  $r_l$  and,  $\rho_{\text{boost}}$  remain the same but allow the peak  
 138 anti-CSP antibody titre,  $CSP_{\text{boost}}$ , to vary. Therefore, for a fourth dose given at time  $t_{\text{boost}}$  anti-CSP  
 139 antibody titre may be described as

$$140 \quad CSP(t) = CSP_{\text{boost}} \left( \rho_{\text{boost}} e^{-r_s (t - t_{\text{boost}})} + (1 - \rho_{\text{boost}}) e^{-r_l (t - t_{\text{boost}})} \right). \quad (1.12)$$

141 Predicted vaccine efficacy,  $V$ , is linked to antibody titre using a dose-response curve characterised  
 142 as:

143

$$V(t) = V_{\max} \left( 1 - \frac{1}{1 + \left( \frac{CSP(t)}{\beta} \right)^\alpha} \right) \quad (1.13)$$

144

where  $V_{\max}$  is the maximum efficacy against infection and  $\alpha$ , and  $\beta$  are estimated shape and scale

145

parameters respectively. Vaccine parameters are summarised in Table 5.

146

**Table 5. RTS,S antibody model parameters, definitions and values.**

| Parameter             | Description                                                            | Value |
|-----------------------|------------------------------------------------------------------------|-------|
| $r_s$                 | Mean half-life of short-lived antibodies (log scale)                   | 3.33  |
| $r_l$                 | Mean half-life of long-lived antibodies (log scale)                    | 6.20  |
| $CSP_{\text{peak}}$   | Peak anti-CSP (mean log-scale)                                         | 5.34  |
| $\rho_{\text{peak}}$  | Proportion of short-lived response (mean on logit scale)               | 1.85  |
| $CSP_{\text{boost}}$  | Peak anti-CSP after booster (mean on log-scale)                        | 6.43  |
| $\rho_{\text{boost}}$ | Proportion of short-lived response after booster (mean on logit scale) | 1.85  |
| $V_{\max}$            | Maximum efficacy against infection                                     | 0.88  |
| $\alpha$              | Dose-response shape parameter                                          | 0.56  |
| $\beta$               | Dose-response scale parameter                                          | 32    |

147

148

## Correlation of recipients

149

Correlation of recipients follows methodology outlined in Griffin *et al* (2010).[1] Recipients of single

150

interventions were always considered to be randomly assigned. For multiple interventions the

151

correlation between recipients was either random or highly correlated. Given our four interventions

152

labelled  $j = 1, 2, 3, 4$ , each individual is assigned a vector  $u_i$  of length 4, recording the probability of

153

receiving each intervention, where:

154

$$u_i \sim MVN(u_0, V) . \quad (1.14)$$

155

An individual,  $i$ , will receive an intervention if  $z_{ijt} \geq 0$ , where:

156 
$$z_{ijt} \sim N(u_{ij}, 1) . \tag{1.15}$$

157

158 Intervention usage/coverage

159 The usage or coverage levels assessed for each intervention are shown in Table 6.

160 **Table 6. Intervention usage/coverage levels.**

| Intervention | Levels (%)                             | Notes                                                                                         |
|--------------|----------------------------------------|-----------------------------------------------------------------------------------------------|
| LLINs        | 0, 15, 30, 50, 55, 60, 65, 70, and 75. | Usage. Assuming 1.8 people covered per net and that nets are distributed on a 3-yearly cycle. |
| IRS          | 0, 25, 50, 75, 90                      | Coverage                                                                                      |
| SMC          | 0, 25, 50, 75, 90                      | Coverage                                                                                      |
| RTS,S        | 0, 25, 50, 75, 90                      | Coverage                                                                                      |
| Treatment    | 60                                     | Fixed                                                                                         |

161

162 An overview of the impact of pairwise combinations of interventions at increasing coverage is shown  
 163 in Figure S5.

164 Health production functions

165 We describe the procedure for estimating the empirically-derived production functions (for IRS,  
 166 Vaccine and SMC) below. We assumed that the response (coverage of a given intervention), was  
 167 beta distributed with mean  $\mu_i$  and dispersion parameter  $\phi$

168 
$$Y_i \sim \text{Beta}(\mu_i, \phi) \tag{1.16}$$

169 Where the mean,  $\mu_i$ , is related to the predictor (input into the system = spend on a given  
 170 intervention), by the following function

171 
$$C = 0 \quad \text{when } P < U + N$$
  

$$C = (1 - C_\tau)^{-\frac{U}{N}} \left( (1 - C_\tau)^{\frac{U}{N}} - (1 - C_\tau)^{\frac{P}{N}} \right), \quad \text{otherwise} \quad (1.17)$$

172 Where,  $C$  is the coverage achieved for a given spend per person reached,  $P$ . The commodity cost and  
 173 baseline variable cost is denoted by  $U$  and  $N$  respectively and  $C_\tau$  represents the threshold coverage  
 174 above which delivery costs increase. We restricted  $C \geq$  the lower coverage bound for each  
 175 intervention to avoid issues of economies of scale at low coverage levels. The function in equation  
 176 (1.17) represents the inverse of the functions in equations (1.1-1.2) in the main text.

177 For this parameterisation of the beta distribution we have

178 
$$E[Y] = \mu$$
  

$$\text{Var}[Y] = \frac{\mu(1-\mu)}{1+\phi} \quad (1.18)$$

179 The log-likelihood, for  $n$  independent samples is

180 
$$L(\lambda, \phi | Y) = \sum_{j=1}^{j=n} L_j(\lambda_j, \phi | y_j) \quad (1.19)$$

181 where

182 
$$L_j(\lambda_j, \phi | y_j) = \ln \Gamma(\phi) - \ln \Gamma(\mu_j \phi) - \ln \Gamma((1 - \mu_j) \phi) + (\mu_j \phi - 1) \ln(y_j) \\ + ((1 - \mu_j) \phi - 1) \ln(1 - y_j). \quad (1.20)$$

183 Parameters  $C_\tau$ ,  $U$ ,  $N$  and  $P$  were fitted in a Bayesian framework using MCMC. To facilitate fitting we  
 184 re-parameterised equation 1.17 so that  $U = \alpha \beta$  and  $N = \alpha(1 - \beta)$  where  $\alpha$  represents a total costs  
 185 and  $\beta$  the proportion of total cost that is fixed.

186 Vaccination production function

187 The response was the proportion of children (aged 12-23 months) that have received the Diphtheria-  
 188 tetanus-pertussis vaccine (DTP3) determined by the predictor, the country spend (\$) on DTP3  
 189 immunization per child under one year old.

190 Coverage data

191 The proportion of children receiving DTP3 vaccination was taken from WHO/Unicef reports.[8] These  
192 reports compile and assess data from multiple sources including: the Expanded Programme on  
193 Immunization (EPI) 30-cluster survey, multiple indicator cluster survey (MICS) and demographic and  
194 health surveys (DHS).[9] Survey years varied between countries but ranged between 2001 and 2013.  
195 As the true denominator was not available, uncertainty surrounding estimates were based on the  
196 sample size reported in DHS surveys, matched by country by year. Where DHS sample size data was  
197 not available for a specific country in a specific year, sample size was assumed to be the mean  
198 sample size of the country for all years where data was present. Where country sample size data was  
199 not available for a country, sample size was assumed to be the mean sample size (across all  
200 countries).

201 Spending data

202 Spending data was calculated based on yearly reported GAVI disbursements.[10] Spending estimates  
203 were adjusted for within-country (non-GAVI) DTP3 spend as reported in the country specific WHO-  
204 UNICEF comprehensive multi-year plan (cMYP).[11] The spending estimates were then standardised  
205 with respect to the estimated population of children under one years old [12] providing an estimate  
206 of the absolute spend on DTP vaccination per child under one years old. To generalise the  
207 production function for any vaccine, the spend was then divided by the mean cost of a full DTP  
208 vaccination course, as reported in the cMYPs, with the result being a cost-multiplier that could be  
209 applied to the cost of a specified full vaccination course.

210 For each country, estimates of spend and coverage across multiple years may not be independent.  
211 Therefore mean estimates of coverage and spend for each country were calculated and used to fit  
212 the model. Confidence intervals surrounding these estimates were 95% exact binomial (for  
213 coverage) and log-normal (for spend).

214 IRS production function

215 The response was the proportion of people protected by IRS spraying determined by the predictor,  
 216 the cost (US \$) per person protected. Both coverage and spending data were obtained from the  
 217 Presidents Malaria Initiative (PMI) Africa IRS (AIRS) project reports.[13] These provided data from 12  
 218 sub-Saharan African countries (Angola, Benin, Burkina Faso, Ethiopia, Ghana, Liberia, Mali,  
 219 Mozambique, Nigeria, Rwanda, Senegal and Zimbabwe) for the year 2012. Exact 95% binomial  
 220 confidence intervals were calculated for estimates of coverage.

221 SMC production function

222 Few data exist to parameterise a production function for SMC. Two trials reporting spend (US \$) per  
 223 child per dose and coverage (% of children receiving a full course) were used, one from a Médecins  
 224 Sans Frontières (MSF) project in Mali [14] and a second from a Clinton Health Access Initiative (CHAI)  
 225 project in Nigeria.[15] Exact 95% binomial confidence intervals were calculated for estimates of  
 226 coverage.

227 Priors and posterior estimates

228 Prior distributions and posterior estimates for production function parameters are detailed in Table  
 229 7.

230 **Table 7. Prior and posterior distributions for estimated health production functions.**

| Production function | Parameter | Prior (median, 95% interval) | Posterior Estimate and 95% Credible Interval |
|---------------------|-----------|------------------------------|----------------------------------------------|
| Vaccine             | $\alpha$  | 0.47 (0.16, 1.02)            | 0.34 (0.14, 0.51)                            |
|                     | $\beta$   | 0.50 (0.29, 0.71)            | 0.32 (0.13, 0.57)                            |
|                     | $C_t$     | 0.50 (0.29, 0.71)            | 0.28 (0.11, 0.44)                            |
|                     | $\phi$    | 2.00 (0.19, 21.12)           | 0.16 (0.10, 0.28)                            |
| IRS                 | $\alpha$  | 1.83 (0.55, 4.38)            | 1.71 (1.17, 2.02)                            |
|                     | $\beta$   | 0.46 (0.30, 0.62)            | 0.30 (0.17, 0.44)                            |
|                     | $C_t$     | 0.70 (0.57, 0.82)            | 0.61 (0.47, 0.72)                            |
|                     | $\phi$    | 2.01 (0.04, 100.92)          | 0.04 (0.02, 0.14)                            |
| SMC                 | $\alpha$  | 0.79 (0.54, 1.11)            | 0.77 (0.55, 1.04)                            |
|                     | $\beta$   | 0.50 (0.35, 0.65)            | 0.45 (0.30, 0.62)                            |
|                     | $C_t$     | 0.60 (0.38, 0.80)            | 0.53 (0.36, 0.72)                            |
|                     | $\phi$    | 2.01 (0.04, 100.92)          | 0.05 (0.01, 0.23)                            |

231

## 232 Estimating severe cases, deaths and disability adjusted life years

233 Severe disease was estimated using methods presented in Griffin *et al* (2015).[16] Briefly, the  
234 proportion of new infections that go on to develop into severe disease is calculated by:

$$235 \quad \theta(a, \varepsilon) = \theta_0 \left( \theta_1 + \frac{1 - \theta_1}{1 + f_V(a)((I_{VA}(a, \varepsilon) + I_{VM}(a, \varepsilon)) / I_{V0})^{\kappa V}} \right), \quad (1.21)$$

236 where  $\theta_0$  represents the proportion of new infections that go on to develop into severe disease in  
237 completely naïve individuals in contrast to  $\theta_0\theta_1$ , the proportion in individuals with maximal  
238 immunity. The parameters  $I_{V0}$  and  $\kappa V$  are scale and shape parameters respectively. The functions  
239  $I_{VA}(a, \varepsilon)$  and  $I_{VM}(a, \varepsilon)$  are immunity functions, quantifying the acquired and maternal immunity  
240 respectively in an individual of age  $a$  in an area with an EIR of  $\varepsilon$ . The function  $f_V(a)$  modifies the  
241 effect of immunity with respect to age and is defined as:

$$242 \quad f_V(a) - 1 = (1 - f_V0) / (1 + (a / a_V)^{\gamma_V}). \quad (1.22)$$

243 We use estimates of the proportion of severe cases that result in death ( $pd$ ) and a scaling factor to  
244 adjust hospital deaths ( $hd$ ) to estimate the number of deaths.

245 Disability adjusted life years (DALYs) were calculated using the simplified methodology of the 2010  
246 global burden of disease (GBD).[17]

247 The *DALY* calculation consisted of the sum of the years of life lost (*YLL*) and the years of life with  
248 disability (*YLD*). These components are calculated by:

$$249 \quad \begin{aligned} DALY &= YLL + YLD \\ YLL &= \sum_{a=1}^{a=n} D_a L_a \\ YLD &= \sum_{a=1}^{a=n} E_{ua} W_u L_u + E_{sa} W_s L_s \end{aligned} \quad (1.23)$$



250 where for all  $n$  age groups  $a=1,2,\dots,n$ ,  $D_a$  and  $L_a$  are the number of deaths and life expectancy in  
 251 age group  $a$ ,  $E_{ua}$  and  $E_{sa}$  are the number of uncomplicated and severe episodes in age group  $a$   
 252 with associated disability weights  $W_u$  and  $W_s$  and episode lengths  $L_u$  and  $L_s$  respectively.

253 These calculations are characterised by: i) no discounting for time, ii) equal age weights and, iii) *YLL*  
 254 calculated using a normative life table.

255 DALY parameters are summarised in Table 8.

256 **Table 8. Disability adjusted life year parameters.**

| <b>Disease manifestation</b> | <b>Length of episode ( <math>L</math> )</b> | <b>Disability weight ( <math>W</math> )</b> |
|------------------------------|---------------------------------------------|---------------------------------------------|
| Uncomplicated (0-5)          | 0.01375                                     | 0.211                                       |
| Uncomplicated (5-15)         | 0.01375                                     | 0.195                                       |
| Uncomplicated (15-99)        | 0.01375                                     | 0.172                                       |
| Severe                       | 0.04795                                     | 0.600                                       |

257

258 Alternative outcome measures

259 Reduction in DALYs

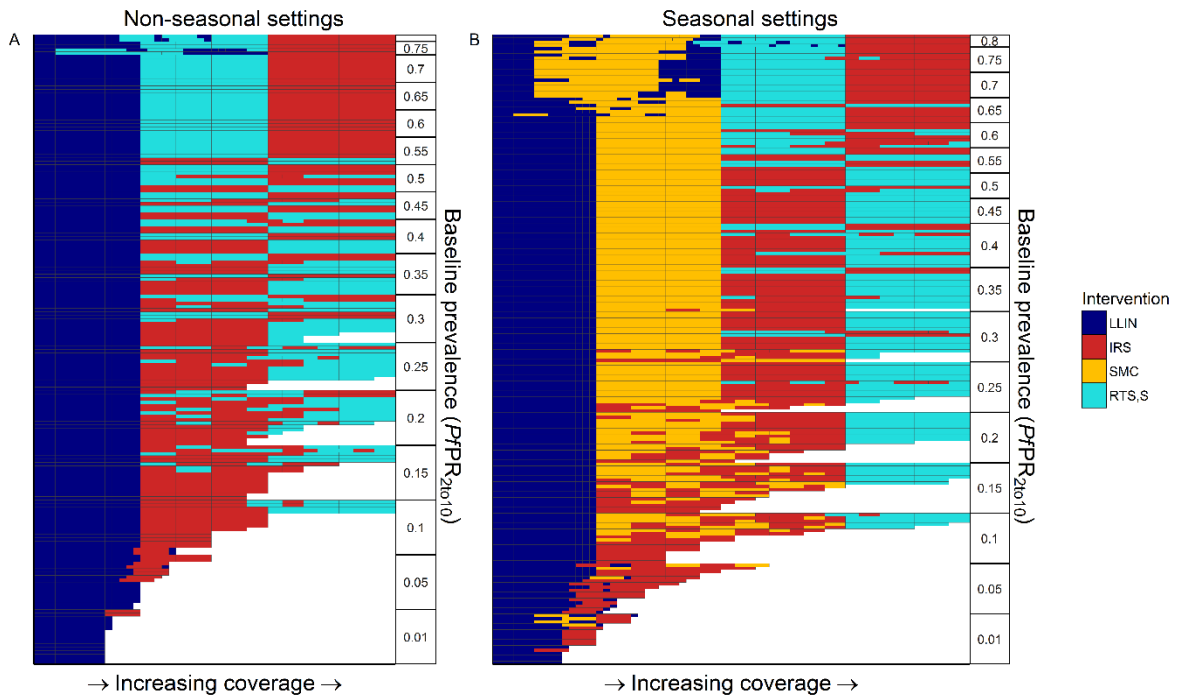

260

261 **Figure S1. Costs-effective scale-up path ways with linear costs and DALYs outcome measure.**

262 Each row represents a cost-effective scale-up pathway (minimising clinical incidence in all age groups) for a  
263 specific transmission setting (baseline  $PfPR_{2-10}$ , seasonal profile, vector profile, intervention correlation)  
264 ordered by  $PfPR_{2-10}$  on the y-axis. Interventions are scaled-up in the order reading along the row from left to  
265 right, with the fill colour representing the intervention being scaled-up. Panels split the output into A) non-  
266 seasonal settings and B) seasonal settings, with the latter including SMC as an option.

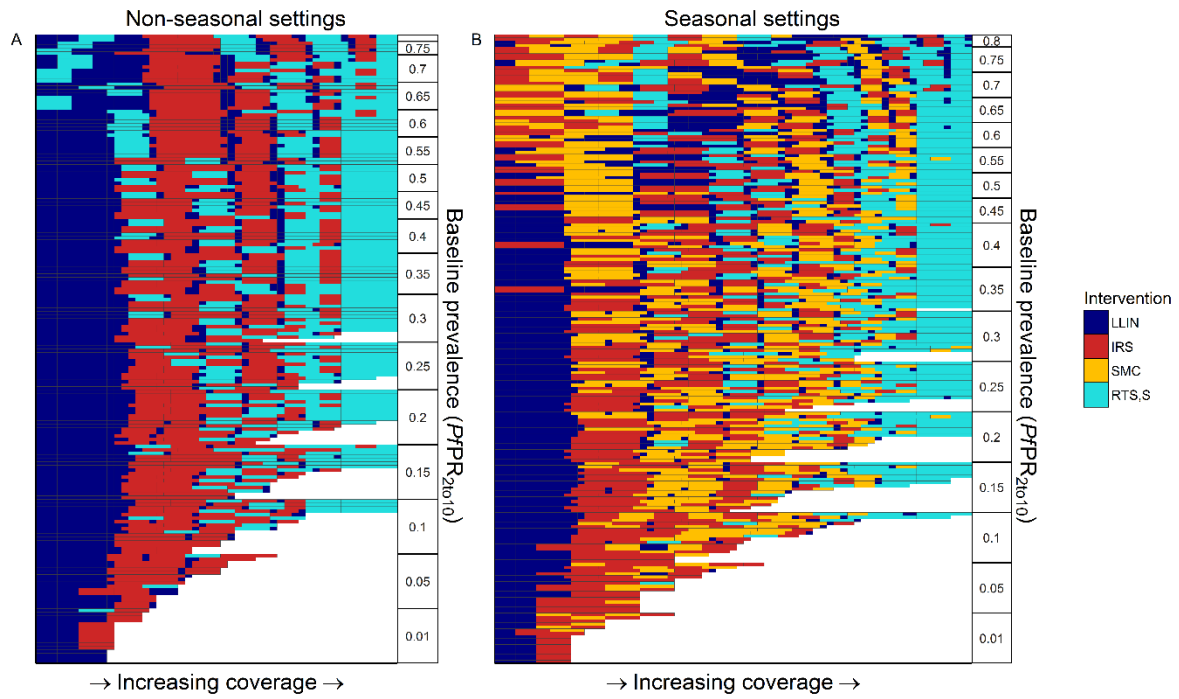

267

268 **Figure S2. Costs-effective scale-up path ways with nonlinear costs and DALYs outcome measure.**

269 Each row represents a cost-effective scale-up pathway (minimising clinical incidence in all age groups) for a  
 270 specific transmission setting (baseline  $PfPR_{2_10}$ , seasonal profile, vector profile, intervention correlation)  
 271 ordered by  $PfPR_{2_10}$  on the y-axis. Interventions are scaled-up in the order reading along the row from left to  
 272 right, the fill colour representing the intervention being scaled-up. Panels split the output into A) non-seasonal  
 273 settings and B) seasonal settings, with the latter including SMC as an option.

274

275 Reduction in clinical incidence in children 6 months – 5 year olds.

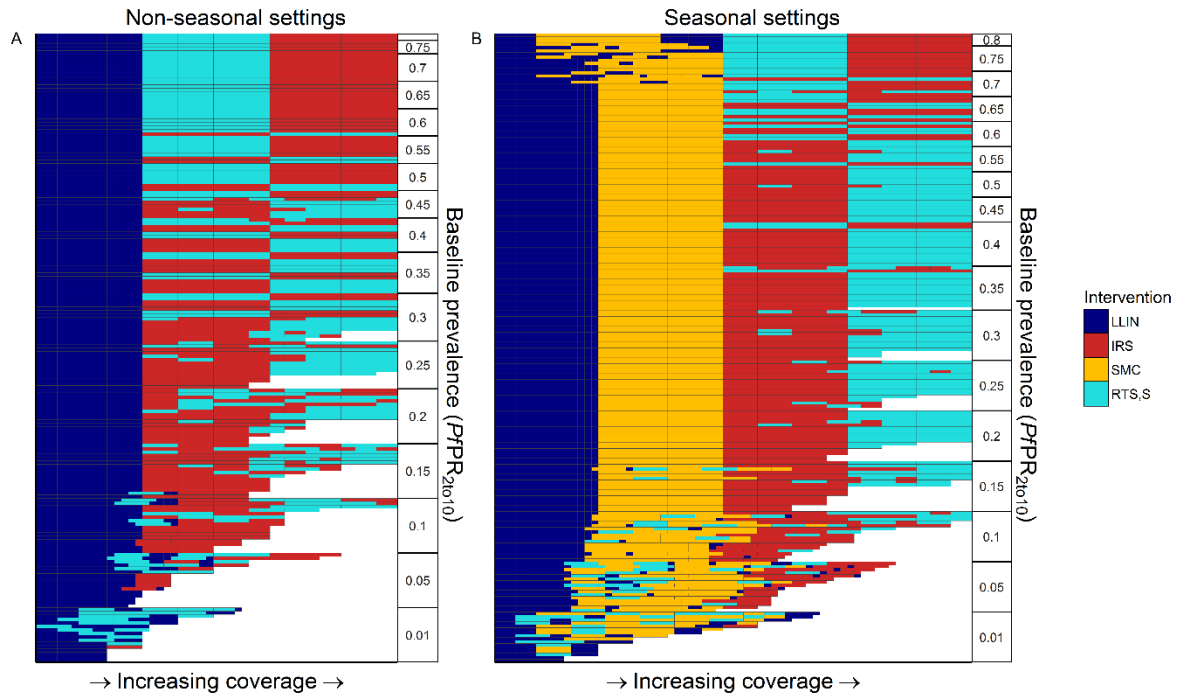

276

277 **Figure S3. Costs-effective scale-up path ways with linear costs and clinical incidence in all 6 month to 5 year**  
278 **olds outcome measure.**

279 Each row represents a cost-effective scale-up pathway (minimising clinical incidence in 6 month to 5 year olds)

280 for a specific transmission setting (baseline  $PfPR_{2-10}$ , seasonal profile, vector profile, intervention correlation)

281 ordered by  $PfPR_{2-10}$  on the y-axis. Interventions are scaled-up in the order reading along the row from left to

282 right, with the fill colour representing the intervention being scaled-up. Panels split the output into A) non-

283 seasonal settings and B) seasonal settings, with the latter including SMC as an option.

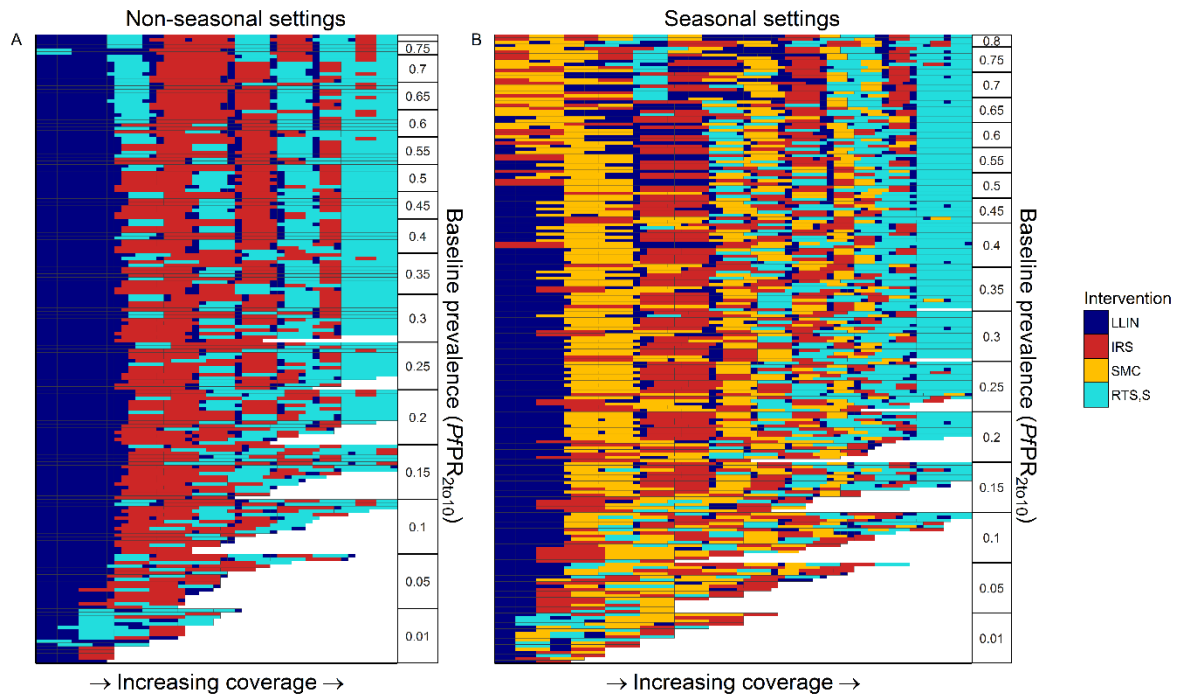

284

285 **Figure S4. Costs-effective scale-up path ways with nonlinear costs and clinical incidence in all 6 month to 5**  
 286 **year olds outcome measure.**

287 Each row represents a cost-effective scale-up pathway (minimising clinical incidence in 6 month to 5 year olds)  
 288 for a specific transmission setting (baseline  $PfPR_{2-10}$ , seasonal profile, vector profile, intervention correlation)  
 289 ordered by  $PfPR_{2-10}$  on the y-axis. Interventions are scaled-up in the order reading along the row from left to  
 290 right, the fill colour representing the intervention being scaled-up. Panels split the output into A) non-seasonal  
 291 settings and B) seasonal settings, with the latter including SMC as an option.

292 Pairwise intervention efficacies

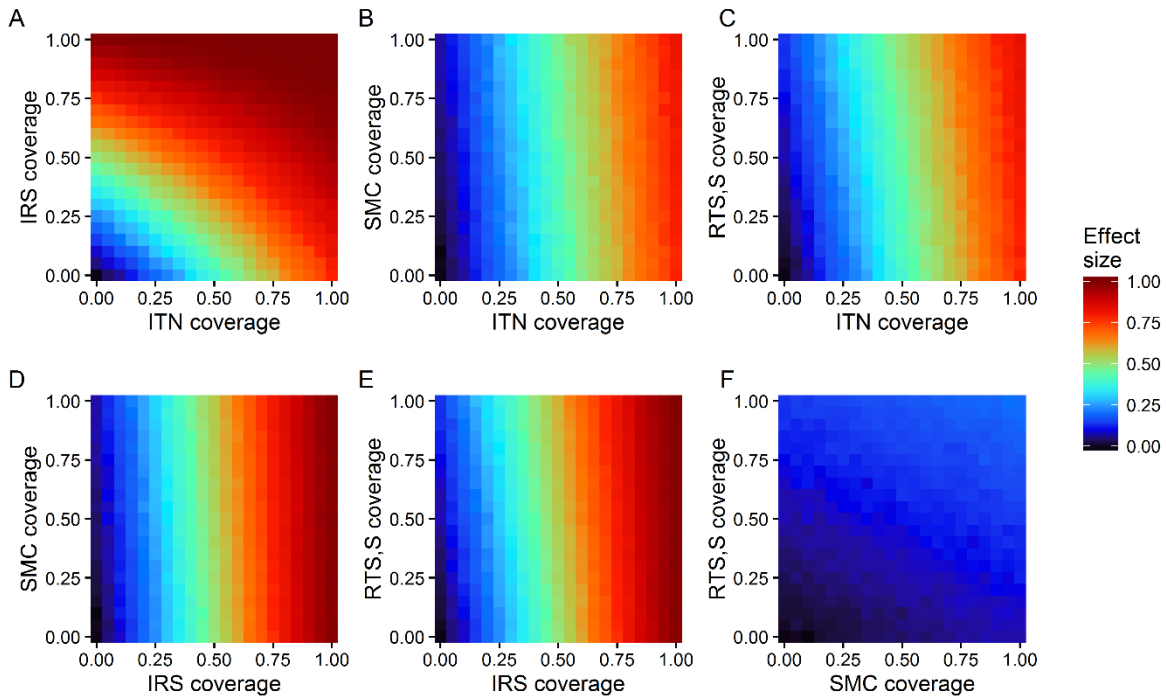

293

294

295 **Figure S5. Pairwise comparisons of interventions effect size at different coverages.**

296 Each panel represents a different pairwise comparison of interventions included in the analysis at varying

297 coverages. Effect is measured as the standardised reduction in cases (all age groups) over a ten year period.

298 The vector control interventions (ITN and IRS) show the greatest impact. ITN coverage of 1 in the model

299 equates to approximately 75% usage. All estimates are for a representative scenario with baseline prevalence

300 of 40% and a median vector bionomics profile.

## 301 References

- 302 1 Griffin JT, Hollingsworth TD, Okell LC, *et al.* Reducing Plasmodium falciparum malaria  
303 transmission in Africa: a model-based evaluation of intervention strategies. *PLoS Med*  
304 2010;**7**:e1000324. doi:10.1371/journal.pmed.1000324
- 305 2 Griffin JT, Ferguson NM, Ghani AC. Estimates of the changing age-burden of Plasmodium  
306 falciparum malaria disease in sub-Saharan Africa. *Nat Commun* 2014;**5**:3136.  
307 doi:10.1038/ncomms4136
- 308 3 White MT, Griffin JT, Churcher TS, *et al.* Modelling the impact of vector control interventions  
309 on Anopheles gambiae population dynamics. *Parasit Vectors* 2011;**4**:153.
- 310 4 National Weather Service. Climate Prediction Center.  
311 <http://www.cpc.ncep.noaa.gov/products/international/> (accessed 17 Feb2016).
- 312 5 Griffin JT, Bhatt S, Sinka ME, *et al.* Potential for reduction of burden and local elimination of  
313 malaria by reducing Plasmodium falciparum malaria transmission: a mathematical modelling  
314 study. *Lancet Infect Dis* 2016;**3099**:1–8. doi:10.1016/S1473-3099(15)00423-5
- 315 6 Penny MA, Verity R, Bever CA, *et al.* Public health impact and cost-effectiveness of the  
316 RTS,S/AS01 malaria vaccine: a systematic comparison of predictions from four mathematical  
317 models. *Lancet* 2015;**6736**. doi:10.1016/S0140-6736(15)00725-4
- 318 7 White MT, Verity R, Griffin JT, *et al.* Immunogenicity of the RTS,S/AS01 malaria vaccine and  
319 implications for duration of vaccine efficacy: secondary analysis of data from a phase 3  
320 randomised controlled trial. *Lancet Infect Dis* 2015;**3099**:1450–8. doi:10.1016/S1473-  
321 3099(15)00239-X
- 322 8 WHO. Immunization, Vaccines and Biologicals.  
323 2015.[http://www.who.int/immunization/monitoring\\_surveillance/data/en/](http://www.who.int/immunization/monitoring_surveillance/data/en/) (accessed 18  
324 Mar2015).

- 325 9 World Health Organization. Diphtheria tetanus toxoid and pertussis (DTP3) immunization  
326 coverage among 1-year-olds (%).  
327 2011.[http://apps.who.int/gho/indicatorregistry/App\\_Main/view\\_indicator.aspx?iid=88](http://apps.who.int/gho/indicatorregistry/App_Main/view_indicator.aspx?iid=88)
- 328 10 GAVI. Disbursements and commitments. 2015.<http://www.gavi.org/results/disbursements/>  
329 (accessed 13 Mar2015).
- 330 11 WHO-UNICEF. WHO-UNICEF guidelines for developing a comprehensive multi-year plan  
331 (cMYP)tle.  
332 2015.[http://www.who.int/immunization/programmes\\_systems/financing/tools/cmyp/en/](http://www.who.int/immunization/programmes_systems/financing/tools/cmyp/en/)
- 333 12 The World Bank. Population, total. 2015.<http://data.worldbank.org/indicator/SP.POP.TOTL>  
334 (accessed 18 Mar2015).
- 335 13 PMI. President's Malaria Initiative Africa Indoor Residual Spraying Project.  
336 2012.<http://www.africairs.net/> (accessed 5 Jun2015).
- 337 14 MSF. Project summary note. Seasonal Malaria Chemoprevention (SMC). 2012.
- 338 15 CHAI. Coverage and cost-effectiveness of public and private sector delivery methods of  
339 seasonal malaria chemoprevention in Northern Nigeria. 2013.
- 340 16 Griffin JT, Hollingsworth TD, Reyburn H, *et al*. Gradual acquisition of immunity to severe  
341 malaria with increasing exposure. *Proc Biol Sci* 2015;**282**. doi:10.1098/rspb.2014.2657
- 342 17 Murray CJL, Ezzati M, Flaxman AD, *et al*. GBD 2010: Design, definitions, and metrics. *Lancet*  
343 2012;**380**:2063–6. doi:10.1016/S0140-6736(12)61899-6
- 344
- 345
